# Supplementary material for: Ionothermal synthesis of open-framework metal phosphates with a Kagomé lattice network exhibiting canted anti-ferromagnetism
Source: Royal Society of Chemistry journal article supplement (doi:10.1039/c4tc00290c), 2014-06-09
Supplement: c4tc00290c2.pdf [file c4tc00290c2.pdf]

Supporting Information

# Ionothermal Synthesis of Open-Framework Metal phosphates with a Kagomé Lattice Network exhibiting Canted Anti-Ferromagnetism

*Guangmei Wang<sup>a</sup>, Martin Valldor<sup>c</sup>, Bert Mallick<sup>a</sup>, Anja-Verena Mudring<sup>a,b\*</sup>*

<sup>a</sup>Inorganic Chemistry III – Materials Engineering and Characterization, Ruhr-Universität Bochum, D-44780 Bochum

<sup>b</sup> Materials Science and Engineering, Iowa State University, Ames, IA 50011 USA and Critical Materials Institute, Ames Laboratory, Ames, IA 50011 USA

<sup>c</sup> Physics of Correlated Matter, Max-Planck-Institute for Chemical Physics of Solids, D-01187 Dresden.

Table 1a. Atomic coordinates ( $\times 10^4$ ) and equivalent isotropic displacement parameters ( $\text{\AA}^2 \times 10^3$ ) for  $(\text{NH}_4)_2\text{Co}_3(\text{HPO}_4)_2\text{F}_4$  (**1**). U(eq) is defined as one third of the trace of the orthogonalized  $U_{ij}$  tensor.

|       | x        | y       | z       | U(eq) |
|-------|----------|---------|---------|-------|
| Co(1) | 8181(1)  | 2276(1) | 5724(1) | 10(1) |
| Co(2) | 10000    | 5000    | 5000    | 10(1) |
| P(1)  | 11569(1) | 1168(1) | 6850(1) | 9(1)  |
| O(1)  | 8780(2)  | 4867(2) | 6782(3) | 14(1) |
| O(2)  | 10323(2) | 2308(3) | 5894(3) | 14(1) |
| O(3)  | 7782(2)  | -233(2) | 4515(2) | 13(1) |
| O(4)  | 12756(2) | 2456(3) | 7978(3) | 15(1) |
| F(1)  | 8275(1)  | 1253(2) | 8300(2) | 12(1) |
| F(2)  | 6157(2)  | 2647(2) | 5396(2) | 20(1) |
| N(1)  | 5298(3)  | 188(4)  | 7486(4) | 23(1) |

Table 1b. Atomic coordinates ( $\times 10^4$ ) and equivalent isotropic displacement parameters ( $\text{\AA}^2 \times 10^3$ ) for  $(\text{NH}_4)\text{Co}_3(\text{HPO}_4)_2(\text{H}_2\text{PO}_4)\text{F}_2$  (**2**).  $U(\text{eq})$  is defined as one third of the trace of the orthogonalized  $U_{ij}$  tensor.

|       | x       | y        | z        | $U(\text{eq})$ |
|-------|---------|----------|----------|----------------|
| Fe(1) | -7500   | 7432(1)  | 7675(1)  | 11(1)          |
| Fe(2) | 10000   | 10000    | 12565(1) | 8(1)           |
| Cl(1) | 10000   | 10000    | 7927(1)  | 18(1)          |
| Cl(2) | 5000    | 5000     | 7357(1)  | 19(1)          |
| O(1)  | 7500    | 6825(6)  | 9496(4)  | 19(1)          |
| O(2)  | 9240(5) | 8307(5)  | 11250(4) | 30(1)          |
| O(3)  | 7500    | 7963(7)  | 5862(4)  | 27(1)          |
| O(5)  | 7500    | 5521(5)  | 4344(5)  | 31(1)          |
| O(6)  | 9235(5) | 8265(5)  | 3875(4)  | 35(1)          |
| N(1)  | 7500    | 2634(7)  | 9681(6)  | 23(2)          |
| N(2)  | 2500    | 7887(8)  | 5654(7)  | 26(1)          |
| F(1)  | 7500    | 11077(3) | 12584(4) | 14(1)          |
| P(1)  | 7500    | 7356(2)  | 10837(1) | 9(1)           |
| P(2)  | 7500    | 7613(2)  | 4501(2)  | 10(1)          |
| O(4)  | 7500    | 5505(6)  | 1537(4)  | 37(1)          |

Table 1c. Atomic coordinates ( $\times 10^4$ ) and equivalent isotropic displacement parameters ( $\text{\AA}^2 \times 10^3$ ) for  $\text{KCo}_3(\text{HPO}_4)_2(\text{H}_2\text{PO}_4)\text{F}_2$  (**3**). U(eq) is defined as one third of the trace of the orthogonalized  $U_{ij}$  tensor.

|       | x       | y        | z       | U(eq) |
|-------|---------|----------|---------|-------|
| Co(1) | 3401(1) | 10208(1) | 6932(1) | 8(1)  |
| Co(2) | 2500    | 7500     | 5000    | 7(1)  |
| K(1)  | 5000    | 6518(2)  | 2500    | 27(1) |
| P(1)  | 1728(1) | 11410(1) | 5792(1) | 6(1)  |
| P(2)  | 5000    | 8732(2)  | 7500    | 9(1)  |
| O(1)  | 2327(1) | 10168(3) | 5701(4) | 14(1) |
| O(2)  | 3105(1) | 7635(3)  | 7569(3) | 13(1) |
| O(3)  | 1123(1) | 10170(3) | 6092(4) | 12(1) |
| O(4)  | 3575(1) | 12626(3) | 5946(3) | 14(1) |
| O(5)  | 4422(1) | 9794(4)  | 7947(4) | 20(1) |
| O(6)  | 5297(2) | 7371(4)  | 9064(4) | 21(1) |
| F(1)  | 3368(1) | 11289(3) | 9439(2) | 11(1) |

Table 1d. Atomic coordinates ( $\times 10^4$ ) and equivalent isotropic displacement parameters ( $\text{\AA}^2 \times 10^3$ ) for  $\text{KFe}_3(\text{HPO}_4)_2(\text{H}_2\text{PO}_4)\text{F}_2$  (**4**).  $U(\text{eq})$  is defined as one third of the trace of the orthogonalized  $U_{ij}$  tensor.

|       | x       | y        | z       | U(eq) |
|-------|---------|----------|---------|-------|
| Fe(1) | 3416(1) | 245(1)   | 6957(1) | 10(1) |
| Fe(2) | 2500    | -2500    | 5000    | 10(1) |
| P(1)  | 1730(1) | 1402(1)  | 5815(1) | 9(1)  |
| P(2)  | 5000    | -1298(2) | 7500    | 13(1) |
| F(1)  | 3380(1) | 1320(2)  | 9450(2) | 15(1) |
| O(1)  | 2331(1) | 210(3)   | 5702(3) | 16(1) |
| O(2)  | 3100(1) | -2356(3) | 7593(3) | 16(1) |
| O(3)  | 1144(1) | 138(3)   | 6147(3) | 14(1) |
| O(4)  | 3583(1) | 2655(3)  | 5894(3) | 17(1) |
| O(5)  | 4431(1) | -218(3)  | 7938(3) | 22(1) |
| O(6)  | 5296(1) | -2649(3) | 9043(3) | 25(1) |
| K(1)  | 0       | 1507(2)  | 2500    | 31(1) |

Table 2a. Hydrogen coordinates ( $\times 10^4$ ) and isotropic displacement parameters ( $\text{\AA}^2 \times 10^3$ ) for for ( $\text{NH}_4$ )<sub>2</sub>Co<sub>3</sub>(HPO<sub>4</sub>)<sub>2</sub>F<sub>4</sub> (**1**)

|      | x         | y        | z        | U(eq)  |
|------|-----------|----------|----------|--------|
| H(5) | 12530(40) | 3150(50) | 8780(50) | 48(13) |
| H(4) | 4448(19)  | -240(50) | 7090(60) | 64(16) |
| H(3) | 5430(40)  | 930(40)  | 6620(30) | 41(12) |
| H(2) | 5470(30)  | 800(30)  | 8550(20) | 18(8)  |
| H(1) | 5880(30)  | -730(30) | 7680(40) | 25(9)  |

Table 2b. Hydrogen coordinates ( $\times 10^4$ ) and isotropic displacement parameters ( $\text{\AA}^2 \times 10^3$ ) for for (NH<sub>4</sub>)Co<sub>3</sub>(HPO<sub>4</sub>)<sub>2</sub>(H<sub>2</sub>PO<sub>4</sub>)F<sub>2</sub> (**2**)

|       | x     | y    | z     | U(eq) |
|-------|-------|------|-------|-------|
| H(4)  | 734   | 2675 | -368  | 33    |
| H(6)  | -1282 | -775 | -1872 | 20    |
| H(1N) | -220  | 2050 | -8591 | 25    |
| H(2N) | 322   | 656  | -7799 | 25    |

Table 2c. Hydrogen coordinates ( $\times 10^4$ ) and isotropic displacement parameters ( $\text{\AA}^2 \times 10^3$ ) for for KCo<sub>3</sub>(HPO<sub>4</sub>)<sub>2</sub>(H<sub>2</sub>PO<sub>4</sub>)F<sub>2</sub> (**3**).

|      | x    | y    | z    | U(eq) |
|------|------|------|------|-------|
| H(3) | 1245 | 9628 | 7052 | 19    |
| H(6) | 4978 | 6778 | 9300 | 32    |

Table 2d. Hydrogen coordinates ( $\times 10^4$ ) and isotropic displacement parameters ( $\text{\AA}^2 \times 10^3$ ) for for KFe<sub>3</sub>(HPO<sub>4</sub>)<sub>2</sub>(H<sub>2</sub>PO<sub>4</sub>)F<sub>2</sub> (**4**)

|      | x        | y         | z        | U(eq)    |
|------|----------|-----------|----------|----------|
| H(6) | 5763(13) | -2450(80) | 9600(70) | 9600(70) |
| H(3) | 1260(40) | -710(80)  | 7010(80) | 7010(80) |

Table 3a. Hydrogen bonds [ $\text{\AA}/^\circ$ ] for  $(\text{NH}_4)_2\text{CO}_3(\text{HPO}_4)_2\text{F}_4$  (1)

| D-H...A            | d(D-H)    | d(H...A)  | d(D...A) | <(DHA) |
|--------------------|-----------|-----------|----------|--------|
| O(4)-H(5)...O(3)#3 | 0.874(19) | 1.84(2)   | 2.711(3) | 174(5) |
| N(1)-H(4)...O(3)#7 | 0.883(13) | 2.26(2)   | 3.049(3) | 148(3) |
| N(1)-H(4)...F(2)#7 | 0.883(13) | 2.54(4)   | 3.091(3) | 121(4) |
| N(1)-H(3)...F(2)   | 0.891(13) | 1.838(16) | 2.702(3) | 163(3) |
| N(1)-H(2)...F(2)#6 | 0.894(13) | 1.791(16) | 2.660(3) | 163(3) |
| N(1)-H(1)...O(4)#4 | 0.885(13) | 2.081(18) | 2.911(3) | 156(3) |

Symmetry transformations used to generate equivalent atoms: #1  $x, -y+1/2, z-1/2$  #2  $-x+2, -y+1, -z+1$  #3  $-x+2, y+1/2, -z+3/2$  #4  $-x+2, y-1/2, -z+3/2$  #5  $-x+2, -y, -z+1$  #6  $x, -y+1/2, z+1/2$  #7  $-x+1, -y, -z+1$

Table 3b. Hydrogen bonds [ $\text{\AA}/^\circ$ ] for  $(\text{NH}_4)\text{CO}_3(\text{HPO}_4)_2(\text{H}_2\text{PO}_4)\text{F}_2$  (2)

| D-H...A              | d(D-H) | d(H...A) | d(D...A) | <(DHA) |
|----------------------|--------|----------|----------|--------|
| O(4)-H(4)...F(1)#6   | 0.90   | 1.94     | 2.816(4) | 165.7  |
| O(6)-H(6)...O(2)#2   | 0.95   | 2.00     | 2.929(4) | 163.3  |
| O(6)-H(6)...F(1)#8   | 0.95   | 2.59     | 3.140(4) | 117.3  |
| N(1)-H(1N)...O(4)#9  | 0.97   | 2.28     | 2.912(3) | 122.5  |
| N(1)-H(1N)...O(2)#9  | 0.97   | 2.42     | 2.959(3) | 115.1  |
| N(1)-H(2N)...O(6)#10 | 0.93   | 2.09     | 2.977(3) | 157.7  |

Symmetry transformations used to generate equivalent atoms: #1  $-x-1/2, -y+1/2, -z-1$  #2  $x, -y, z-1/2$  #3  $-x-1/2, y+1/2, -z-1/2$  #4  $x, -y+1, z-1/2$  #5  $x, -y+1, z+1/2$  #6  $-x, y, -z-1/2$  #7  $-x-1/2, y-1/2, -z-1/2$  #8  $x, -y, z+1/2$  #9  $x, y, z-1$  #10  $-x, -y, -z-1$

Table 3c. Hydrogen bonds [ $\text{\AA}/^\circ$ ] for  $\text{KCO}_3(\text{HPO}_4)_2(\text{H}_2\text{PO}_4)\text{F}_2$  (3)

| D-H...A            | d(D-H) | d(H...A) | d(D...A) | <(DHA) |
|--------------------|--------|----------|----------|--------|
| O(3)-H(3)...O(4)#4 | 0.82   | 2.10     | 2.897(4) | 163.7  |
| O(6)-H(6)...O(3)#4 | 0.82   | 2.45     | 3.233(4) | 160.6  |

Symmetry transformations used to generate equivalent atoms: #1  $x, -y+2, z-1/2$  #2  $-x+1, -y+2, -z+1$  #3  $-x+1/2, -y+3/2, -z+1$  #4  $-x+1/2, y-1/2, -z+3/2$  #5  $-x+1, y, -z+3/2$  #6  $x, y, z-1$  #7  $x+1/2, -y+3/2, z-1/2$  #8  $-x+1, -y+1, -z+1$  #9  $x, -y+1, z-1/2$  #10  $-x+1/2, y-1/2, -z+1/2$  #11  $x+1/2, y-1/2, z$  #12  $-x+1/2, -y+5/2, -z+1$  #13  $-x+1/2, y+1/2, -z+3/2$  #14  $x-1/2, y+1/2, z$  #15  $x, y, z+1$  #16  $x, -y+2, z+1/2$

Table 3d. Hydrogen bonds [ $\text{\AA}/^\circ$ ] for  $\text{KFe}_3(\text{HPO}_4)_2(\text{H}_2\text{PO}_4)\text{F}_2$  (4)

| D-H...A              | d(D-H)  | d(H...A) | d(D...A) | <(DHA) |
|----------------------|---------|----------|----------|--------|
| O(6)-H(6)...F(1)#14  | 0.95(2) | 1.91(3)  | 2.827(3) | 162(5) |
| O(3)-H(3)...O(4)#4 0 | 0.91(2) | 1.99(2)  | 2.892(3) | 170(7) |

Symmetry transformations used to generate equivalent atoms: #1  $x, -y, z-1/2$  #2  $-x+1/2, -y+1/2, -z+1$  #3  $-x+1/2, -y-1/2, -z+1$  #4  $-x+1/2, y-1/2, -z+3/2$  #5  $-x+1/2, y+1/2, -z+3/2$  #6  $-x+1, y, -z+3/2$  #7  $x, -y, z+1/2$  #8  $-x, -y, -z+1$  #9  $x+1/2, y-1/2, z+1$  #10  $x-1/2, -y+1/2, z-1/2$  #11  $x-1/2, y+1/2, z-1/2$  #12  $x-1/2, -y-1/2, z-1/2$  #13  $-x, y, -z+1/2$  #14  $-x+1, -y, -z+2$

- Figure. S1 Experimental and simulated X-ray powder diffraction patterns  $(\text{NH}_4)_2\text{Co}_3(\text{HPO}_4)_2\text{F}_4$  (1),  $(\text{NH}_4)\text{Co}_3(\text{HPO}_4)_2(\text{H}_2\text{PO}_4)\text{F}_2$  (2),  $\text{KCo}_3(\text{HPO}_4)_2(\text{H}_2\text{PO}_4)\text{F}_2$  (3), and  $\text{KFe}_3(\text{HPO}_4)_2(\text{H}_2\text{PO}_4)\text{F}_2$  (4)
- Figure S2 The IR spectra of  $(\text{NH}_4)_2\text{Co}_3(\text{HPO}_4)_2\text{F}_4$  (1),  $(\text{NH}_4)\text{Co}_3(\text{HPO}_4)_2(\text{H}_2\text{PO}_4)\text{F}_2$  (2),  $\text{KCo}_3(\text{HPO}_4)_2(\text{H}_2\text{PO}_4)\text{F}_2$  (3), and  $\text{KFe}_3(\text{HPO}_4)_2(\text{H}_2\text{PO}_4)\text{F}_2$  (4)
- Figure S3 TG curves of  $(\text{NH}_4)_2\text{Co}_3(\text{HPO}_4)_2\text{F}_4$  (1),  $(\text{NH}_4)\text{Co}_3(\text{HPO}_4)_2(\text{H}_2\text{PO}_4)\text{F}_2$  (2),  $\text{KCo}_3(\text{HPO}_4)_2(\text{H}_2\text{PO}_4)\text{F}_2$  (3), and  $\text{KFe}_3(\text{HPO}_4)_2(\text{H}_2\text{PO}_4)\text{F}_2$  (4)
- Figure S4 Thermal ellipsoid plot (50% probability) and atomic labeling scheme of  $(\text{NH}_4)_2\text{Co}_3(\text{HPO}_4)_2\text{F}_4$  (1),  $(\text{NH}_4)\text{Co}_3(\text{HPO}_4)_2(\text{H}_2\text{PO}_4)\text{F}_2$  (2),  $\text{KCo}_3(\text{HPO}_4)_2(\text{H}_2\text{PO}_4)\text{F}_2$  (3), and  $\text{KFe}_3(\text{HPO}_4)_2(\text{H}_2\text{PO}_4)\text{F}_2$  (4)
- Figure S5  $\chi^2$ -T curves of  $(\text{NH}_4)_2\text{Co}_3(\text{HPO}_4)_2\text{F}_4$  (1),  $(\text{NH}_4)\text{Co}_3(\text{HPO}_4)_2(\text{H}_2\text{PO}_4)\text{F}_2$  (2),  $\text{KCo}_3(\text{HPO}_4)_2(\text{H}_2\text{PO}_4)\text{F}_2$  (3), and  $\text{KFe}_3(\text{HPO}_4)_2(\text{H}_2\text{PO}_4)\text{F}_2$  (4)



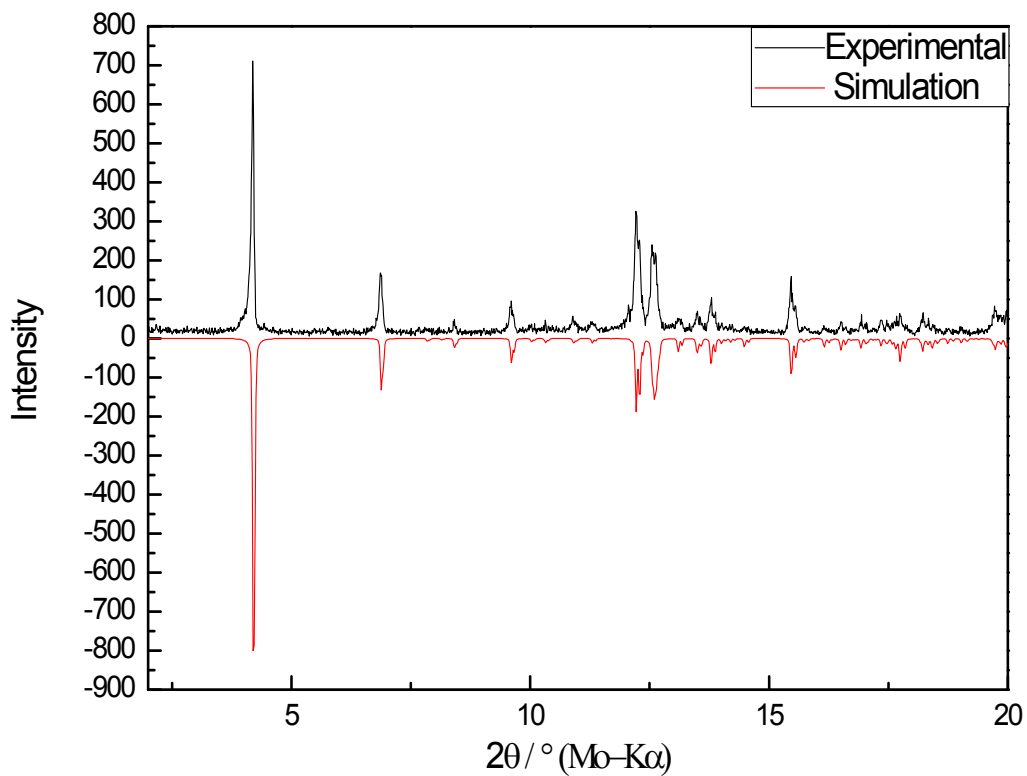

**Figure S1a**

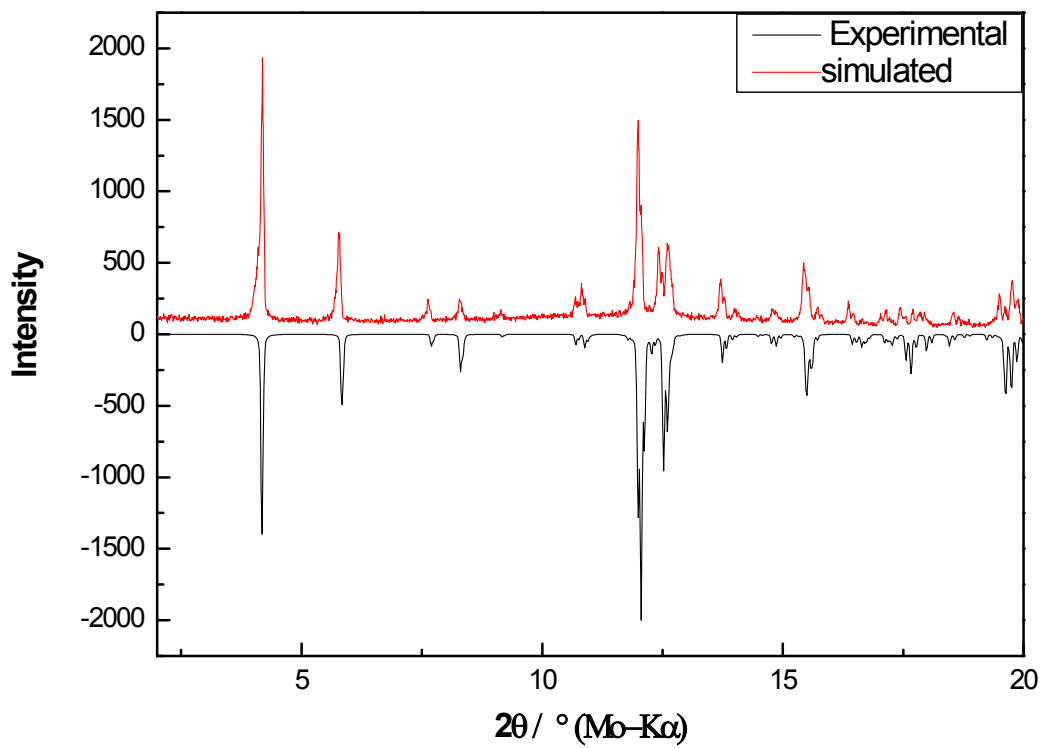

**Figure S1b**

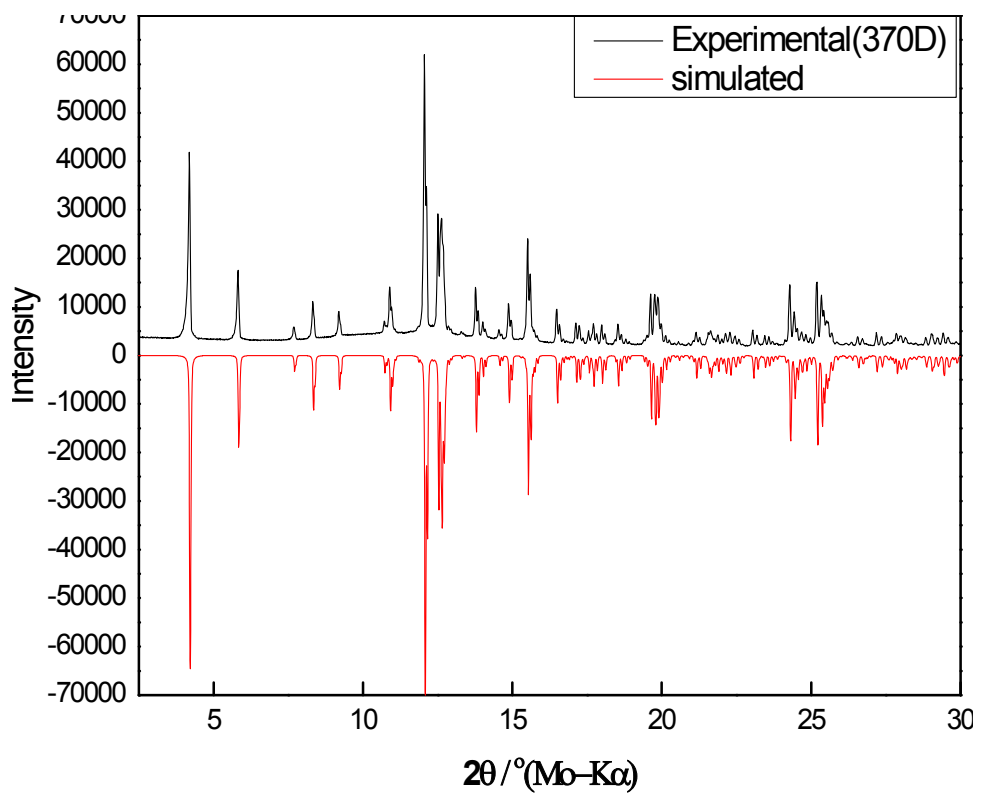

**Figure S1c**

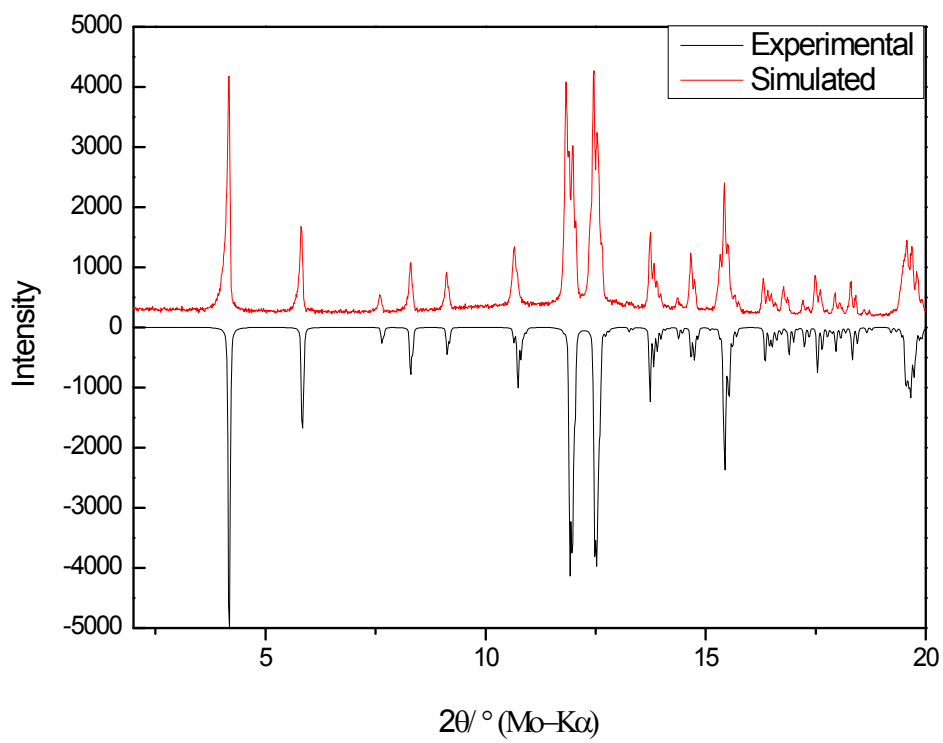

**Figure S1d**

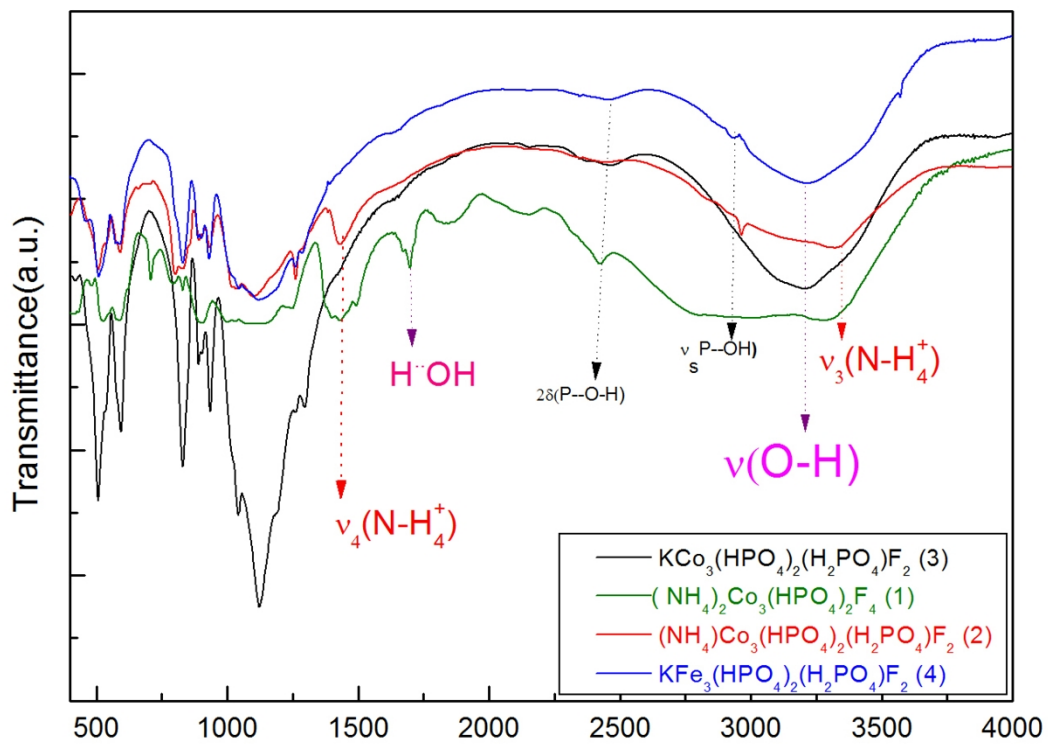

Figure S2

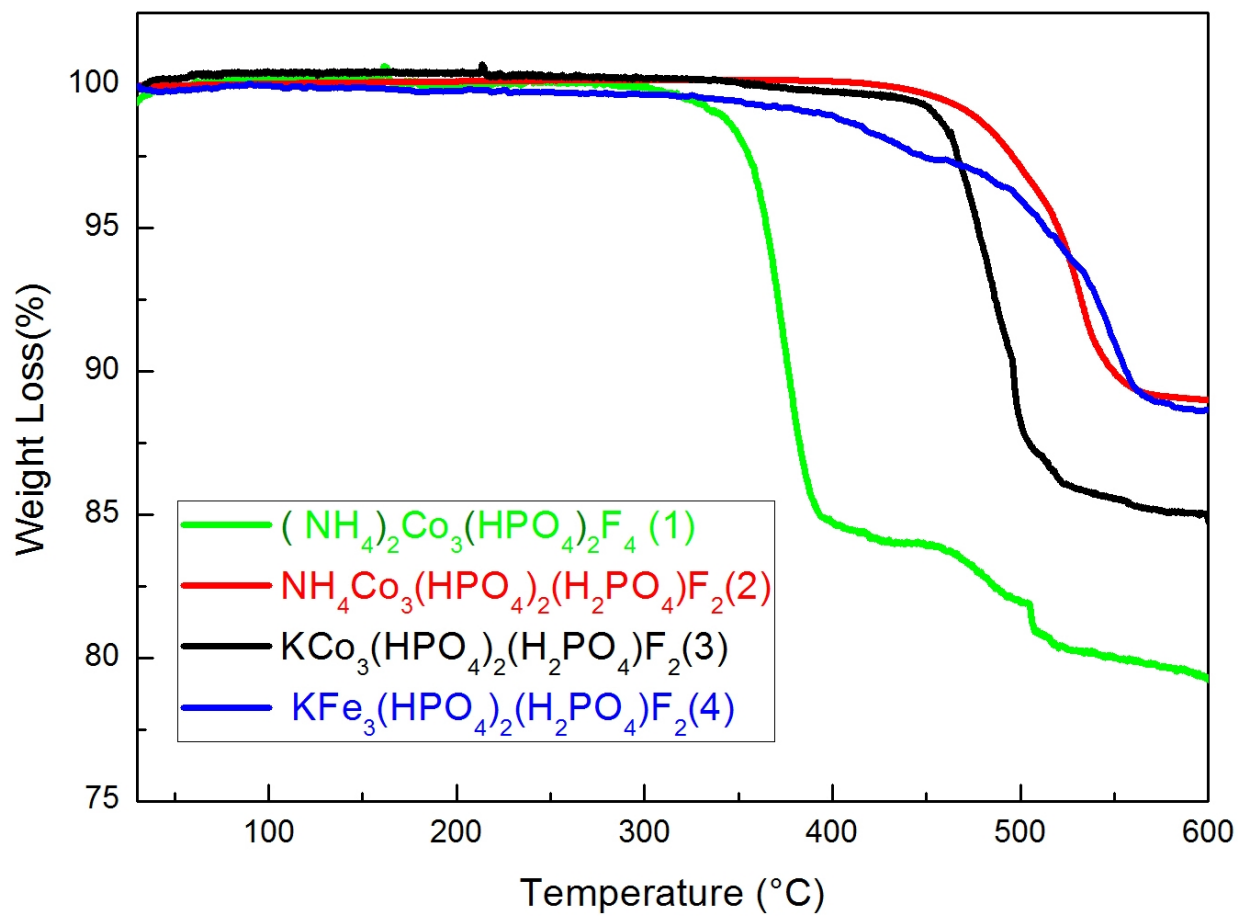

Figure S3

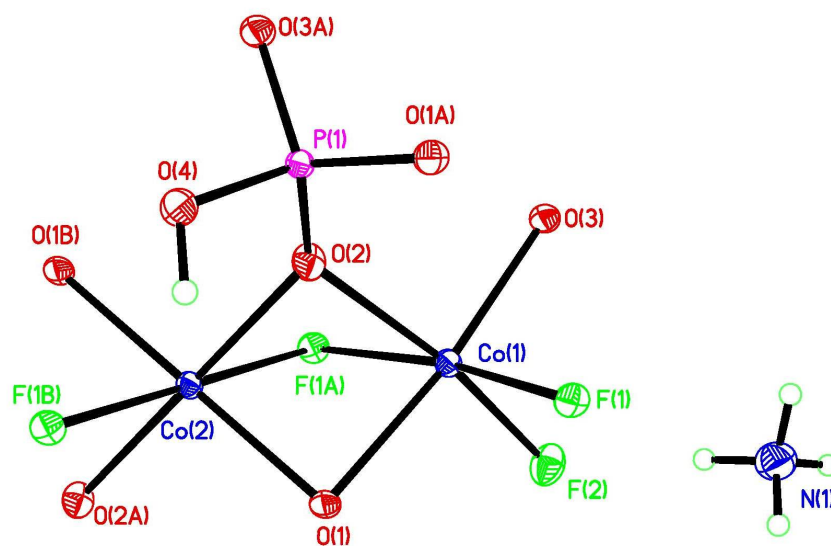

Figure S4a

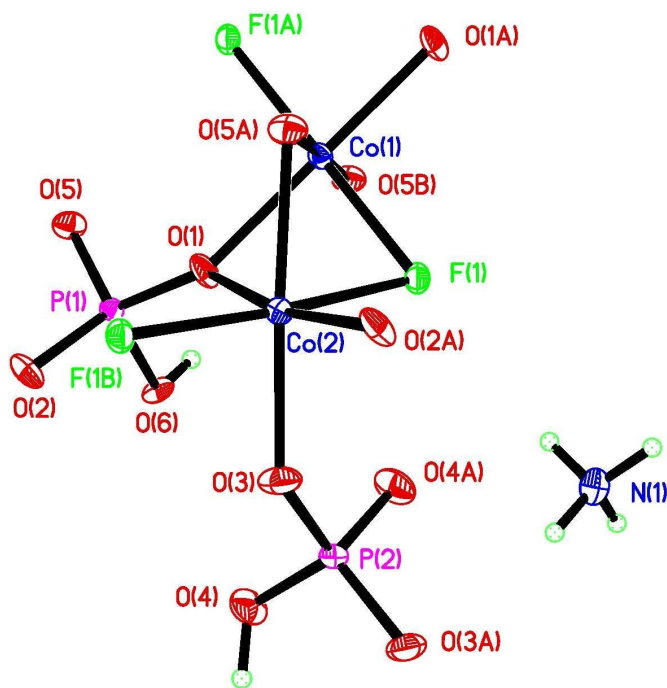

Figure S4b

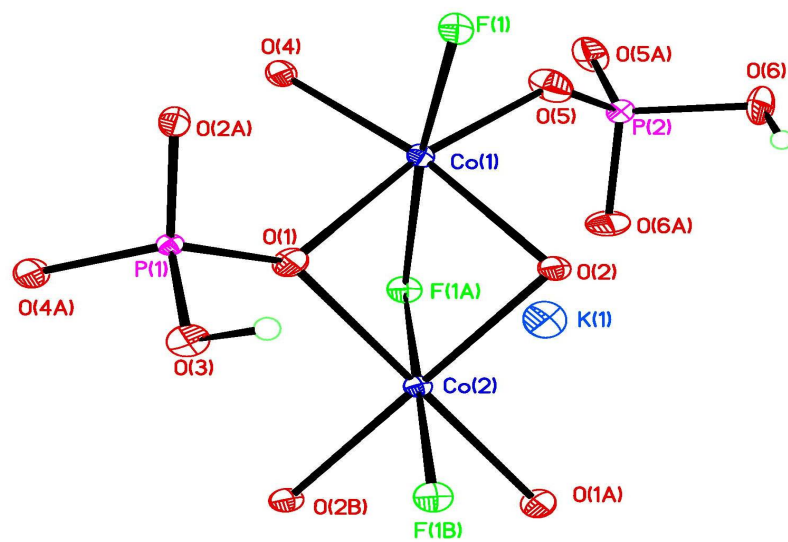

Figure S4c

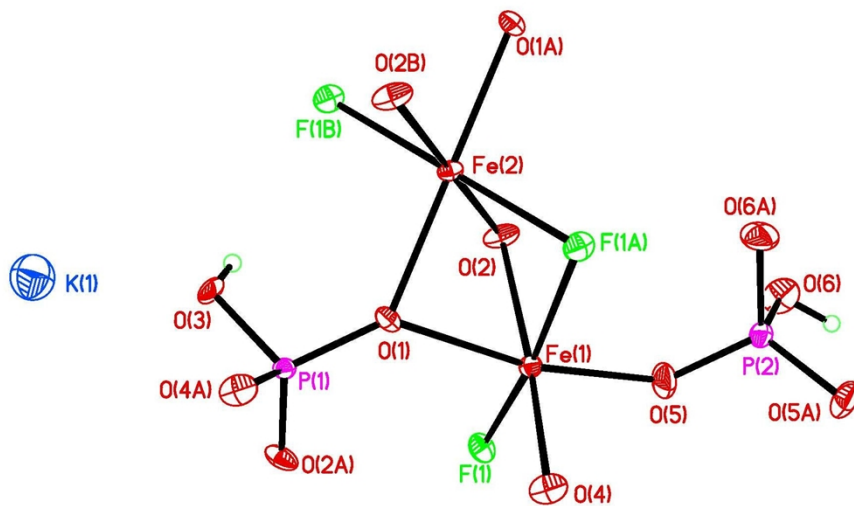

Figure S4d

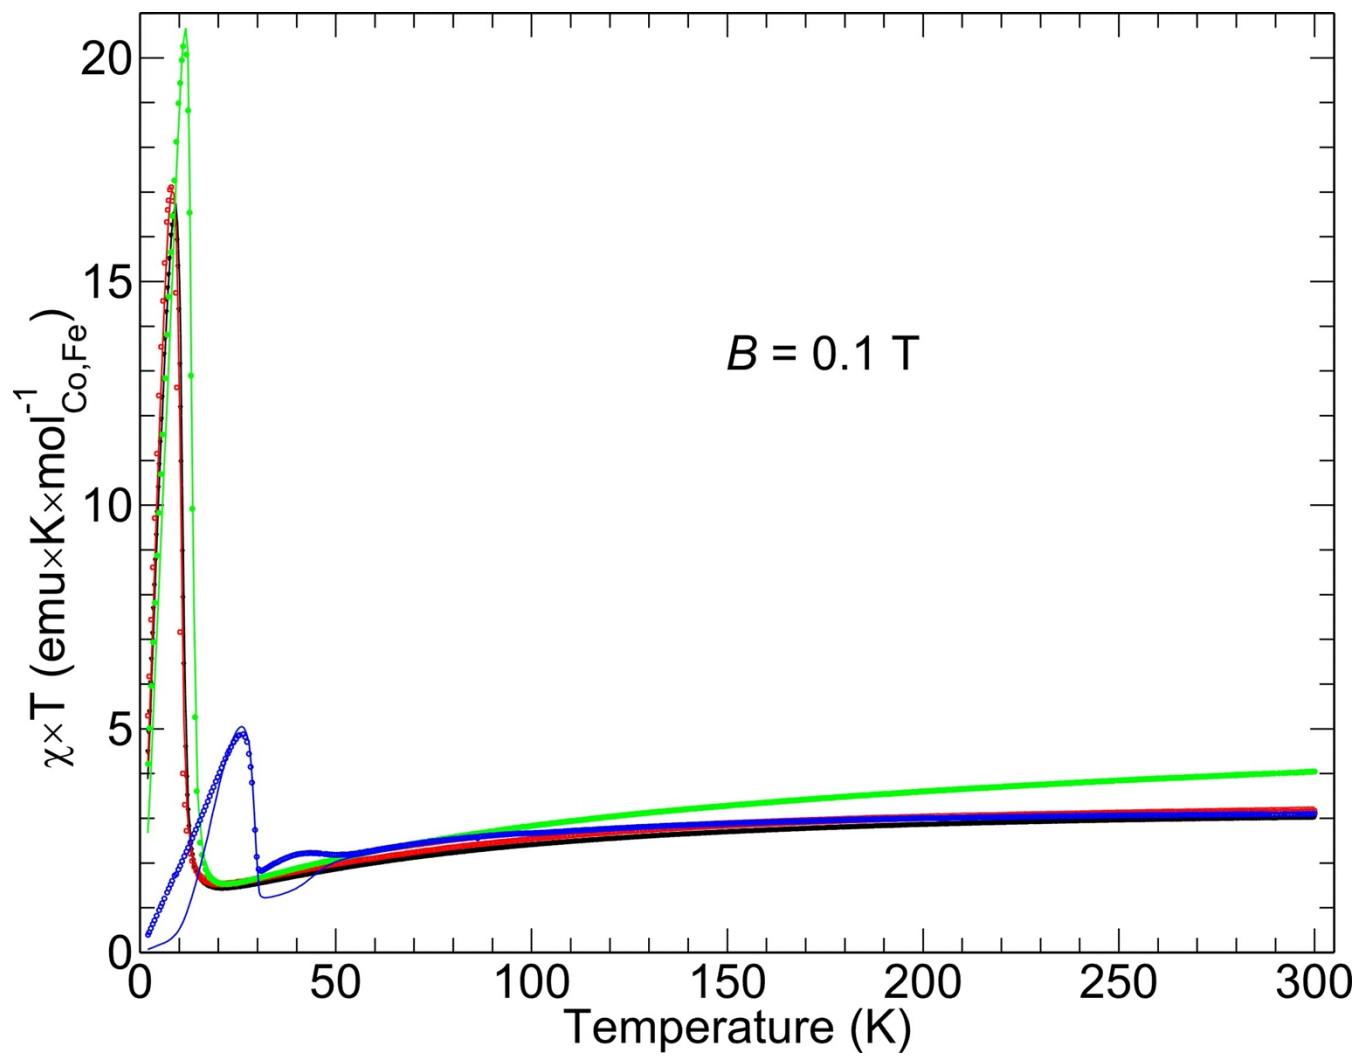

Figure S5
